# Supplementary material for: Emulation of high-resolution land surface models using sparse Gaussian processes with application to JULES
Source: Copernicus journal article supplement (doi:10.5194/gmd-15-1913-2022), 2022-03-08
Supplement: Supplementary file 1 [file gmd-15-1913-2022-supplement.zip]

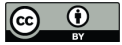

*Supplement of*

## **Emulation of high-resolution land surface models using sparse Gaussian processes with application to JULES**

**Evan Baker et al.**

*Correspondence to:* Evan Baker (e.baker@exeter.ac.uk)

- gmd-15-1913-2022-supplement-title-page.pdf
- Code
  - Emulator.py
  - Joint\_Validation.py
  - README.txt

The copyright of individual parts of the supplement might differ from the article licence.
